## Thyronamines—Past, Present, and Future

S. Piehl,\* C. S. Hoefig,\* T. S. Scanlan, and J. Köhrl

Institut für Experimentelle Endokrinologie (S.P., C.S.H., J.K.), Charité-Universitätsmedizin Berlin, Charité Campus Virchow Klinikum (Südring 10), 13353 Berlin, Germany; and Department of Physiology and Pharmacology (T.S.S.), Oregon Health & Science University, Portland, Oregon 97239-3098

Thyronamines (TAMs) are a newly identified class of endogenous signaling compounds. Their structure is identical to that of thyroid hormone and deiodinated thyroid hormone derivatives, except that TAMs do not possess a carboxylate group.

Despite some initial publications dating back to the 1950s, TAMs did not develop into an independent area of research until 2004, when they were rediscovered as potential ligands to a class of G protein-coupled receptors called trace-amine associated receptors. Since this discovery, two representatives of TAMs, namely 3-iodothyronamine (3-T<sub>1</sub>AM) and thyronamine (T<sub>0</sub>AM), have been detected *in vivo*. Intraperitoneal or central injection of 3-T<sub>1</sub>AM or T<sub>0</sub>AM into mice, rats, or Djungarian hamsters caused various prompt effects, such as metabolic depression, hypothermia, negative chronotropy, negative inotropy, hyperglycemia, reduction of the respiratory quotient, ketonuria, and reduction of fat mass. Although their physiological function remains elusive, 3-T<sub>1</sub>AM and T<sub>0</sub>AM have already revealed promising therapeutic potential because they represent the only endogenous compounds inducing hypothermia as a prophylactic or acute treatment of stroke and might thus be expected to cause fewer side effects than synthetic compounds.

This review article summarizes the still somewhat scattered data on TAMs obtained both recently and more than 20 yr ago to yield a complete and updated picture of the current state of TAM research. (**Endocrine Reviews 32: 64–80, 2011**)

- I. Introduction
- II. Structure
- III. *In Vivo* Detection
- IV. Systemic and Local Effects
  - A. Reduction of metabolic rate by 3-T<sub>1</sub>AM
  - B. Hypothermia
  - C. Negative chronotropy and negative inotropy of 3-T<sub>1</sub>AM
  - D. Negative chronotropy of T<sub>0</sub>AM
  - E. Hyperglycemia
  - F. Reduction of the respiratory quotient
  - G. Ketonuria and reduction of fat mass
  - H. 3-T<sub>1</sub>AM does not induce torpor
    - I. Application routes other than ip and doses other than 50 mg/kg body weight
    - J. Inhibition of monoamine transporters
- V. Receptors
  - A. Early descriptions of thyronamine binding sites
  - B. Receptors for thyroid hormones and biogenic amines
  - C. Trace amine-associated receptor 1
  - D. Alpha<sub>2A</sub> adrenergic receptor
  - E. Concerted function of TAAR-1 and Adra<sub>2A</sub>?
- VI. Signal Transduction Pathways Activated by Thyronamines
- VII. Biosynthesis and Deiodination Reactions
- VIII. Metabolism
  - A. First findings
  - B. Sulfation
  - C. Oxidative deamination
- IX. Cellular Uptake and Transport
- X. Therapeutic Applications
- XI. Thyronamines in Comparison to Other Recently Characterized TH Metabolites and Their Targets
  - A. Mitochondrial TR $\alpha$ 1 and effects of 3,5,-T<sub>2</sub>
  - B. Plasma membrane-mediated effects of T<sub>4</sub>, T<sub>3</sub>, and Tetrac

ISSN Print 0021-972X ISSN Online 1945-7197

Printed in U.S.A.

Copyright © 2011 by The Endocrine Society

doi: 10.1210/er.2009-0040 Received November 4, 2009. Accepted August 17, 2010.

First Published Online September 29, 2010

\* S.P. and C.S.H. contributed equally to this work.

Abbreviations: Adra<sub>2A</sub>,  $\alpha_{2A}$  Adrenergic receptor; DAT, dopamine transporter; Dio, deiodinase; DITPA, 3,5-diiodothyropropionic acid; GPCR, G protein-coupled receptor; icv, intracerebroventricular; LC-MS/MS, liquid chromatography-tandem mass spectrometry; LP, long photoperiod; NET, norepinephrine transporter; PI3K, phosphoinositide 3-kinase; RQ, respiratory quotient; SP, short photoperiod; SULT, sulfotransferase; TA, thyroacetic acid; TAAR, trace-amine-associated receptor; TAM (or T<sub>0</sub>AM), thyronamine; 3-T<sub>1</sub>AM, 3-iodothyronamine; TH, thyronine; TR, T<sub>3</sub> receptor; UCP, uncoupling protein; VMAT2, vesicular monoamine transporter 2.

- XII. Novel Synthetic Analogs of Thyroid Hormones, Specific Ligands, DITPA, and Eprotirome, Specific Ligands to T<sub>3</sub> Receptor Isoforms
- XIII. Conclusions

## I. Introduction

The history of thyronamine (TAM) research appears peculiar. From 1951 to 1984, a few papers were published now and then, but most lacked any topical consistency. In 2004, after a 20-yr gap in TAM research, TAMs were rediscovered as potential ligands to a new class of G protein-coupled receptors (GPCRs) now referred to as trace-amine-associated receptors (TAARs) (1–3). Since this discovery, the field of TAM research has regained considerable momentum.

## II. Structure

TAMs are a novel class of endogenous signaling compounds. In terms of structure, they differ from thyroid (pro-)hormone L-T<sub>4</sub> (T<sub>4</sub>) and deiodinated thyronine (TH) derivatives only concerning the absence of the carboxylate group of the alanine side chain. THs and TAMs are designated T<sub>x</sub> and T<sub>x</sub>AM, respectively, with “x” indicating the number of iodine atoms per molecule, thus following the same rules for nomenclature. As illustrated in Fig. 1, there are nine THs and TAMs that

differ by either the number or the position of the iodine atoms.

So far, only the three-dimensional structure of T<sub>3</sub>AM has been published (4). In an attempt to compare the conformational properties of T<sub>3</sub>AM with those of the corresponding thyronine T<sub>3</sub> and to examine the relative influence of the ethylamine side chain on the diphenylether conformation, the borosalicylate salt of T<sub>3</sub>AM was subjected to crystallographic analysis. The experiments revealed that the overall molecular conformation of T<sub>3</sub>AM was similar to that of T<sub>3</sub>, displaying a twist-skewed conformation of the diphenylether portion and a proximal orientation of the 3'-iodine atom. These observations suggested that the amino group is of key importance in the determination of the conformation of T<sub>3</sub>AM.

## III. *In Vivo* Detection

So far, only two representatives of TAMs, namely 3-iodothyronamine (3-T<sub>1</sub>AM) and thyronamine (T<sub>0</sub>AM), have been detected *in vivo* using a liquid chromatography-tandem mass spectrometry (LC-MS/MS) method (3, 5). Both compounds were detected in blood, heart, liver, adipose tissue, thyroid, and brain of adult male C57BL/6 mice, as well as in brain of several other species, such as Long-Evans rats and guinea pigs (3). 3-T<sub>1</sub>AM was also detected in blood and brain of Djungarian hamsters (6).

The presence of the other TAMs *in vivo* has not been reported yet. In the LC-MS/MS studies by Scanlan *et al.* (3), the samples were simultaneously monitored for T<sub>0</sub>AM, T<sub>1</sub>AM, and T<sub>2</sub>AM presence, but no T<sub>2</sub>AM isomer was detected in any of the tissues. Likewise, T<sub>3</sub>AM has not been detected from biological sources so far (7, 8). In early experiments applying butanolic extraction and subsequent paper chromatographic separation, <sup>131</sup>I-labeled T<sub>4</sub>AM was found in plasma and in the thyroid glands, but not in the thyroid-derived thyroglobulin fractions of rats treated with <sup>131</sup>I (7). Furthermore, <sup>131</sup>I-labeled T<sub>4</sub>AM, but not T<sub>3</sub>AM, was detected in plasma of two patients who suffered from metastasizing thyroid tumors and were treated with high doses of <sup>131</sup>I. Based on these observations, T<sub>4</sub>AM was postulated to be present *in vivo* at a serum concentration equaling 1 to 2% of the serum T<sub>4</sub> concentration (7, 9). However, T<sub>4</sub>AM biosynthesized from

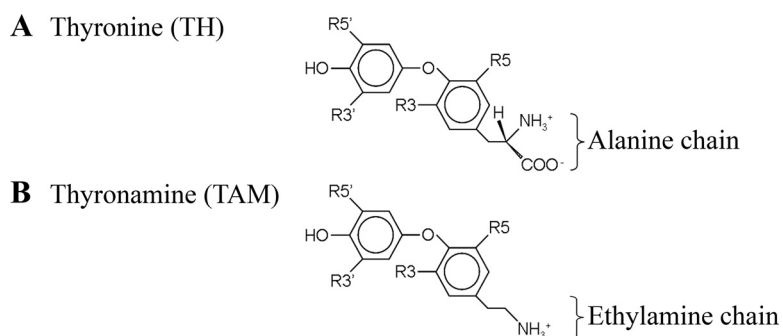

| Analyte                   | R3 | R5 | R3' | R5' |
|---------------------------|----|----|-----|-----|
| T <sub>0</sub> (AM)       | H  | H  | H   | H   |
| 3-T <sub>1</sub> (AM)     | I  | H  | H   | H   |
| 3'-T <sub>1</sub> (AM)    | H  | H  | I   | H   |
| 3,5-T <sub>2</sub> (AM)   | I  | I  | H   | H   |
| 3,3'-T <sub>2</sub> (AM)  | I  | H  | I   | H   |
| 3',5'-T <sub>2</sub> (AM) | H  | H  | I   | I   |
| T <sub>3</sub> (AM)       | I  | I  | I   | H   |
| rT <sub>3</sub> (AM)      | I  | H  | I   | I   |
| T <sub>4</sub> (AM)       | I  | I  | I   | I   |

**FIG. 1.** A, Structure of THs. B, Structure and nomenclature of TAMs. R, Variable residue.

endogenous nonradioactive iodine precursors has not been described yet.

Hitherto, several publications have reported on endogenous TAM concentrations in tissues. 3-T<sub>1</sub>AM was estimated to be present in brain of Long-Evans rats at subpicomole per gram quantities (3). This concentration is lower compared with 1 to 6 pmol/g T<sub>4</sub> reported for rat brain using a RIA technique (10). Although this concentration seems low at first glance, it was emphasized that the cell type-specific and subcellular distributions of TAMs are unknown. Therefore, their effective concentrations within a given cell type and in specific cellular compartments might be significantly higher than the average whole tissue concentrations measured. In the hearts of male Wistar rats, the endogenous 3-T<sub>1</sub>AM concentration averaged 68 pmol/g wet weight and showed a wide range of variation from 1 to 120 pmol/g wet weight (11). Interestingly, the average value of 68 pmol/g wet weight corresponds to the cardiac content of classical modulators of heart function, such as adrenaline, dopamine, and adenosine (11). Moreover, it exceeds the endogenous intracardial T<sub>3</sub> and T<sub>4</sub> concentrations by a factor of 20 and 2, respectively (11). Even if it was not stated whether the hearts had been perfused, these findings indicate that TAMs can override TH concentrations locally in the heart. In serum of Djungarian hamsters, endogenous 3-T<sub>1</sub>AM was detected at a concentration of roughly 6 nM (6).

In 2008, Geraci *et al.* (12) showed at the American Thyroid Association (ATA) meeting in Chicago, Illinois, the first endogenous 3-T<sub>1</sub>AM concentration in human tissues (higher concentrations in thyroid, skeletal muscle, adipose tissue, and prostate, ~60 nM; n = 2–5) and serum (~60 nM; n = 16) using a solid phase extraction and LC-MS/MS method described by DeBarber *et al.* (5). Independently of the Scanlan group (12), Soldin *et al.* (13) described at the 2009 ATA meeting in Palm Beach, Florida, a novel analytical method applying LC-MS/MS for the simultaneous identification and quantification of THs and TAMs in biological samples using today's most sensitive triple quadrupole mass spectrometer (API 5000 LC/MS/MS System). Using an existing procedure for preanalytical extraction of THs and TAMs from mouse tissues and a previously validated LC-MS/MS analytical method published by Piehl *et al.* (14), mouse tissue 3-T<sub>1</sub>AM levels in the range of 1 to 20 pmol/g were determined (F. Wohlgemuth, C. S. Hoefig, and J. Köhrle, unpublished data).

But there are still controversial discussions in the scientific community about the detection and quantification of endogenous 3-T<sub>1</sub>AM. Part of this controversy might be related to the strong binding of 3-T<sub>1</sub>AM to apolipoprotein B100 in human serum, which leads to very low free TAM concentrations in the range around 60 nM or lower (Ref.

12, and our unpublished data). Surprisingly, 3-T<sub>1</sub>AM and T<sub>0</sub>AM appear to prefer different serum proteins for avid binding compared with THs, which strongly bind to T<sub>4</sub> binding globulin, transthyretin, albumin, and to some extent also to lipoproteins (15). Currently, no validated and peer-reviewed procedure has been published that allows for the concomitant and simultaneous determination of both the TH and the TAM profiles from one whole blood, serum, or plasma sample using an efficient and reproducible extraction procedure and LC-MS/MS analytics.

#### IV. Systemic and Local Effects

The physiological roles of TAMs remain elusive. The first documented biological activity of TAMs was reported for their remarkable sensitization of the inhibitory effect of 10<sup>-6</sup>/cm<sup>3</sup> adrenaline on the isolated intestine of thyroidectomized rabbits. Surprisingly, triiodothyronamine (probably 3,3',5-triiodothyronamine) was the most potent compound (10<sup>-18</sup>) compared with thyroxamine (10<sup>-14</sup>) and diiodothyronamine (10<sup>-5</sup>), but unfortunately it has not been clearly specified whether rT<sub>3</sub>AM or T<sub>3</sub>AM was used and which of the three T<sub>2</sub>-thyronamine isomers was actually tested (16). Compared with the thyronines T<sub>4</sub> (10<sup>-11</sup>) and triiodothyronine (10<sup>-15</sup>), the TAMs were more potent and acted immediately without the latency period observed for the THs (16). These authors already proposed an *in situ* decarboxylation of THs to TAMs by hypothyroid rabbit intestinal tissue. In further studies from the 1950s, T<sub>4</sub>AM and T<sub>3</sub>AM were only 10% as potent as T<sub>4</sub> in terms of goiter prevention and stimulation of oxygen consumption in rats (17, 18). However, T<sub>3</sub>AM was 36 times as potent as T<sub>4</sub> at inducing tadpole metamorphosis (18). In 1974, it was suggested that TAMs might be derived from THs in adrenergic neurons to act as “thyronergic” neurotransmitters (19). This suggestion was based on preliminary evidence that some enzymes involved in catecholamine biosynthesis, including aromatic L-amino acid decarboxylase, might use T<sub>4</sub> as an alternate substrate.

In more recent studies, ip injection of 3-T<sub>1</sub>AM or T<sub>0</sub>AM into C57BL/6 wild-type mice or Djungarian hamsters caused various prompt effects, such as metabolic depression, hypothermia, negative chronotropy, negative inotropy, hyperglycemia, reduction of the respiratory quotient (RQ), ketonuria, and reduction of fat mass (3, 6). In most of these studies, a dose of 50 mg 3-T<sub>1</sub>AM or T<sub>0</sub>AM/kg body weight was injected (~140 μmol 3-T<sub>1</sub>AM/kg body weight and ~218 μmol T<sub>0</sub>AM/kg body weight). In Djungarian hamsters, this dose leads to an approximately 10-fold increase in 3-T<sub>1</sub>AM blood concentrations from approximately 6 nM to roughly 56 nM (6).

**TABLE 1.** Summary of the pharmacological effects of TAMs identified so far

|                                                                                                                   | Experimental model                                                                   | Mechanism and/or interpretation                                                                                                                     | Refs.        |
|-------------------------------------------------------------------------------------------------------------------|--------------------------------------------------------------------------------------|-----------------------------------------------------------------------------------------------------------------------------------------------------|--------------|
| Central nervous effects                                                                                           |                                                                                      |                                                                                                                                                     |              |
| Hypothermia                                                                                                       | C57BL/6 mice, Djungarian hamsters                                                    | Due to a decrease in metabolic rate                                                                                                                 | 3, 6, 20     |
| Inhibition of monoamine transporters                                                                              | Transfected cell lines                                                               | Hypothesized action as a physiologically relevant neuromodulator                                                                                    | 31           |
| Cardiac effects                                                                                                   |                                                                                      |                                                                                                                                                     |              |
| Negative chronotropy, <sup>a</sup> negative inotropy                                                              | C57BL/6 mice, isolated rat hearts                                                    | Due to effects on intracellular calcium homeostasis                                                                                                 | 3, 11, 22–24 |
| Effects on plasma hormone concentrations                                                                          |                                                                                      |                                                                                                                                                     |              |
| Hyperglycemia, hypoinsulinemia, hyperglucagonemia                                                                 | Primary human and murine pancreatic $\beta$ -cells, male Wistar rats, ROSA26PTX mice | Hypothesized central action increasing the sympathetic tone on pancreatic islets                                                                    | 27, 28       |
| Hypothalamic-pituitary-thyroid-axis: TSH $\downarrow$ , T <sub>4</sub> $\downarrow$ , T <sub>3</sub> $\downarrow$ | Male Wistar rats                                                                     | Causing a state reminiscent of the nonthyroidal illness                                                                                             | 28           |
| Metabolic effects                                                                                                 |                                                                                      |                                                                                                                                                     |              |
| Metabolic rate $\downarrow$ , RQ $\downarrow$ , lipid utilization $\uparrow$ , fat mass $\downarrow$ , ketonuria  | C57BL/6 mice, Djungarian hamsters                                                    | Hypothesized action as a physiologically relevant modulator of metabolism: change in metabolic fuel utilization from carbohydrates to mainly lipids | 6            |

$\downarrow$ , Reduction;  $\uparrow$ , increase.

<sup>a</sup> Conflicting data have been reported for the cardiac effects of T<sub>0</sub>AM (11, 25, 26).

Currently, it is not known whether such changes in TAM blood and tissue concentrations have to be considered as physiological or pharmacological. Therefore, the effects of TAMs described so far will conditionally be classified and described as pharmacological effects herein (Table 1).

The majority of the pharmacological effects of 3-T<sub>1</sub>AM described so far were detected within minutes after injection and displayed roughly similar time courses. However, the respective amplitudes of metabolic depression, negative chronotropy and inotropy, hypothermia, hyperglycemia, and RQ reduction were reached at different time points, namely at 5 min, less than 10 min, 30 min, 2.5 h, and 3 to 4.5 h after injection, respectively (3, 6, 11). Furthermore, whereas the metabolic rate, heart activity, body temperature, and blood glucose levels were normalized 6 to 8 h after injection, the reduced RQ was maintained for more than 24 h (6). However, ketonuria and the reduction of fat mass were

detected and reversed much later, compared with the aforementioned acute effects of 3-T<sub>1</sub>AM injection.

#### A. Reduction of metabolic rate by 3-T<sub>1</sub>AM

Intraperitoneal injection of 3-T<sub>1</sub>AM into C57BL/6 wild-type mice and Djungarian hamsters caused a reduction of metabolic rate measured as a decrease in VO<sub>2</sub> from 2.5 to 1.8 ml/g · h within 5 min (6).

#### B. Hypothermia

Upon ip injection into C57BL/6 wild-type mice, 3-T<sub>1</sub>AM and T<sub>0</sub>AM reduced the body temperature within 30 min by roughly 8 C at EC<sub>50</sub> of 59 and 178  $\mu$ mol/kg body weight, respectively (Fig. 2) (3, 20, 21). The mice became inactive but reflexes were retained, indicating that they were not anesthetized. Furthermore, their skin got cool to the touch, but they did not display any compen-

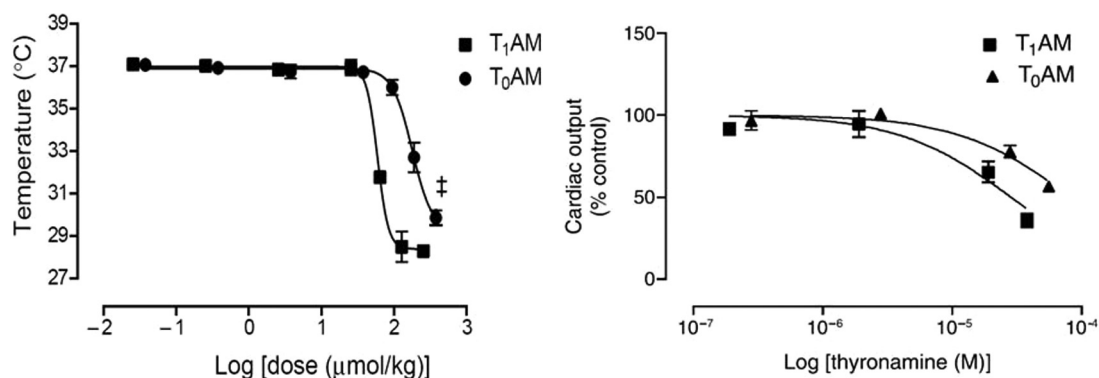

**FIG. 2.** Pharmacological effects of 3-T<sub>1</sub>AM and T<sub>0</sub>AM on body temperature (*left*) and cardiac output (*right*) in mice. †, indicates significant difference between two treatment groups. [Modified with permission from T. S. Scanlan *et al.*: *Nat Med* 10:638–642, 2004 (3). Copyright Nature Medicine.]

satory reactions, such as shivering, huddling, or piloerection. The effect was completely reversible after 6 to 8 h and, so far, no side effects were reported even after repeated treatments over a period of 2 months (3).

Although less pronounced, this hypothermic effect was also observed after ip injection of 50 mg (~140  $\mu\text{mol}$ ) 3-T<sub>1</sub>AM/kg body weight into Djungarian hamsters (6).

In both wild-type C57BL/6 mice and Djungarian hamsters, the amplitude of hypothermia caused by 3-T<sub>1</sub>AM injection (30 min) was preceded by the amplitude of the reduction in metabolic rate (5 min) (6). Because the extent in hypothermia and the amount of metabolic reduction were highly correlated, the hypothermic effect was interpreted as a result of the reduced metabolic rate (6).

### C. Negative chronotropy and negative inotropy of 3-T<sub>1</sub>AM

The hypothermic and metabolic effects of 3-T<sub>1</sub>AM ip injected into wild-type C57BL/6 mice were accompanied by reversible bradycardia (3). The amplitude of the effect was measured 1 h after injection when the heart rate had dropped from approximately 600 to approximately 350 beats per minute. Bradycardia reversed to normal 6–8 h after injection. This negative chronotropic effect of 3-T<sub>1</sub>AM was found to be direct by perfusing an *ex vivo* adult rat denervated working heart preparation with increasing 3-T<sub>1</sub>AM concentrations. 3-T<sub>1</sub>AM reduced the heart rate within minutes at a half maximal IC<sub>50</sub> of 38  $\mu\text{M}$ . The effect persisted throughout the experiment (60 min) and was reversed by removing 3-T<sub>1</sub>AM from the perfusion medium (11). In addition, 3-T<sub>1</sub>AM was even more potent (IC<sub>50</sub> = 29  $\mu\text{M}$ ) at decreasing the cardiac output of the perfused rat hearts (Fig. 2). The amplitude of this negative inotropic effect was measured 10 min after application. Consistent with the negative chronotropic effect observed, the negative inotropy also persisted throughout the experiment (1 h) (3) and was reversible by removing 3-T<sub>1</sub>AM (11). Taken together, 3-T<sub>1</sub>AM elicits chronotropic and inotropic effects on the heart with different potencies (3), which is remarkable considering that only a few endogenous negative inotropic agents such as adenosine, TNF $\alpha$ , and IL-6 have been identified so far (11). Using the *ex vivo* adult rat denervated working heart preparation, 3-T<sub>1</sub>AM also inhibited all further cardiac parameters measured, including systolic aortic pressure (3) and coronary flow (11).

Studies employing isolated perfused rat hearts revealed that 20  $\mu\text{M}$  3-T<sub>1</sub>AM decreased cardiac contractility but did not alter glucose uptake or oxygen consumption compared with mechanical work (22). Only at 25  $\mu\text{M}$  3-T<sub>1</sub>AM, oxygen consumption decreased. Patch clamp analyses on adult rat cardiomyocytes demonstrated altered calcium and potassium homeostasis, including a diminished calcium pool in the sarcoplasmic reticulum (22). Twenty mi-

cromoles of 3-T<sub>1</sub>AM increased the diastolic leak through the ryanodine receptor leading to the negative inotropic action. Furthermore, a longer duration of the action potential was observed, which might be related to 3-T<sub>1</sub>AM inhibiting transient outward  $I_{\text{to}}$  and  $I_{\text{K1}}$  background currents. 3-T<sub>1</sub>AM decreased both the amplitude and the duration of depolarization-induced calcium transients at these pharmacological concentrations. However, no evidence for 3-T<sub>1</sub>AM effects on protein kinase A activity was observed in these studies (22).

The negative chronotropic and inotropic effects of exogenous 3-T<sub>1</sub>AM as well as the increased resistance to ischemic injury, possibly due to its actions on intracellular calcium homeostasis, have been reviewed comprehensively elsewhere (23, 24).

### D. Negative chronotropy of T<sub>0</sub>AM

In the perfused, denervated rat heart, T<sub>0</sub>AM decreased the cardiac output within minutes at an IC<sub>50</sub> of 83  $\mu\text{M}$ , whereas no effect on heart rate was observed (Fig. 2) (3). Because the effect was not abolished by pacing the hearts, it was concluded that T<sub>0</sub>AM is a negative inotropic agent but (in contrast to 3-T<sub>1</sub>AM) not a negative chronotropic agent (11).

Those results are inconsistent with a number of earlier studies using different models. T<sub>0</sub>AM (9.4 to 94  $\mu\text{M}$ ) displayed positive inotropic effects and did not modify the heart rate in an isolated guinea pig atria model (25). In anesthetized rats, 3 to 30 mg T<sub>0</sub>AM/kg body weight (13 to 131  $\mu\text{mol}$  T<sub>0</sub>AM/kg body weight) decreased the heart rate significantly (25). Upon iv injection into anesthetized dogs, T<sub>0</sub>AM increased the cardiac output (25, 26). However, T<sub>0</sub>AM induced concomitant negative chronotropy in one study (25) but positive chronotropy in the other study (26).

In summary, conflicting data have been reported for the cardiac effects of T<sub>0</sub>AM.

### E. Hyperglycemia

In addition to hypothermia and metabolic suppression, C57BL/6 wild-type mice ip injected with 50 mg (~140  $\mu\text{mol}$ ) 3-T<sub>1</sub>AM/kg body weight displayed an increase in blood glucose level (27). This hyperglycemic effect was detectable within minutes after treatment, reaching a maximum of 250% above basal 2 h after 3-T<sub>1</sub>AM injection and was completely reversed 8 h after injection. It was accompanied by a decrease in plasma insulin levels and an increase in plasma glucagon levels. Insulin applied exogenously 2 h after 3-T<sub>1</sub>AM injection normalized the blood glucose levels, indicating that the peripheral tissues had remained sensitive to insulin during the 3-T<sub>1</sub>AM treatment (27). Consistent with these findings, 3-T<sub>1</sub>AM inhibited the glucose-stimulated insulin release from primary murine and human pancreatic  $\beta$ -cells *in vitro* (27).

In a more recent study, ip injection of 50 mg (~218  $\mu\text{mol}$ )  $T_0\text{AM}$ /kg body weight into rats was also reported to increase the plasma concentrations of glucose and glucagon, albeit to a lesser extent than  $3\text{-}T_1\text{AM}$  (28).

#### F. Reduction of the respiratory quotient

Also within minutes after ip injection of  $3\text{-}T_1\text{AM}$ , the RQ decreased from 0.9 to 0.7 in both C57BL/6 wild-type mice and Djungarian hamsters (6). This was indicative of a rapid change in metabolic fuel utilization from predominantly carbohydrates (RQ, ~0.9) before treatment to primarily lipids (RQ, ~0.7) after treatment (6). Minimal RQ values were obtained 3 to 4.5 h after treatment. The reduced RQ was maintained for more than 24 h, *i.e.*, even after recovery of the metabolic rate, and it only returned to normothermia and normalization of cardiac function much later. This indicated that treated animals required several hours to readjust their metabolic machinery to normal catabolism (6).

#### G. Ketonuria and reduction of fat mass

The assumption that energy requirements were primarily covered by lipid utilization in response to  $3\text{-}T_1\text{AM}$  treatment was confirmed by two distinct observations. First, ketone bodies were detected in the urine of Djungarian hamsters from 8 to 28 h after injection (6). Second, a significant loss of body weight due to a loss of fat mass was measured from d 1 to 4 and 6 in summer-acclimatized [long photoperiod (LP)] and winter-acclimatized [short photoperiod (SP)] hamsters, respectively (6).

#### H. $3\text{-}T_1\text{AM}$ does not induce torpor

The initial reports on profound hypothermia, bradycardia, and reduced cardiac output caused by injection of  $3\text{-}T_1\text{AM}$  into C57BL/6 wild-type mice prompted several researchers to question whether  $3\text{-}T_1\text{AM}$  acted as a hormonal cue for torpor initiation. To address this question, the effects of  $3\text{-}T_1\text{AM}$  injection were compared between C57BL/6 wild-type mice, SP and LP Djungarian hamsters. Although mice and LP hamsters do not display spontaneous torpor (29, 30), SP hamsters are seasonally prepared to enter torpor spontaneously, even if fed *ad libitum* (6). However, the metabolic depression via  $3\text{-}T_1\text{AM}$  was greater in mice than in hamsters and also more pronounced in LP hamsters compared with SP hamsters. Furthermore, the amplitudes of metabolic reduction and hypothermia triggered by  $3\text{-}T_1\text{AM}$  were less pronounced compared with torpor. Because additionally the time course of the decrease in metabolic rate and RQ mediated by  $3\text{-}T_1\text{AM}$  were inconsistent with those observed in torpor,  $3\text{-}T_1\text{AM}$  was excluded as the major hormonal stimulus for spontaneous daily torpor (6).

#### I. Application routes other than ip and doses other than 50 mg/kg body weight

A recent study demonstrated that compared with the regular ip injection of 50 mg  $3\text{-}T_1\text{AM}$  or  $T_0\text{AM}$ /kg body weight, intracerebroventricular (icv) infusion of a 100-fold lower dose of  $3\text{-}T_1\text{AM}$  or  $T_0\text{AM}$  (0.5 mg/kg body weight) produced even more pronounced effects on peripheral glucose metabolism in male Wistar rats (28). No leakage of the icv applied substances into peripheral compartments was found. These observations support a central action of  $3\text{-}T_1\text{AM}$  and  $T_0\text{AM}$  on hepatic glucose output and metabolism. The authors suggested an increased sympathetic tone on pancreatic islets via central TAM effects as the underlying mechanism. In addition, sympathetic and parasympathetic projections might activate hepatic glucose production. Furthermore, a direct TAM effect, stronger for  $3\text{-}T_1\text{AM}$  than for  $T_0\text{AM}$ , on the activation of the hypothalamic-pituitary-adrenal axis has to be postulated to account for the increase in corticosterone serum concentration induced by  $3\text{-}T_1\text{AM}$  and  $T_0\text{AM}$ , which was also observed in these studies. Although systemic administration of  $T_1\text{AM}$  and  $T_0\text{AM}$  decreased plasma TSH,  $T_4$ , and  $T_3$ , no such changes were found after icv injection of the low TAM doses.

A recent independent study demonstrated that direct  $3\text{-}T_1\text{AM}$  injection into the arcuate nucleus caused a 3-fold increase in food intake in rodents, suggesting that the orexigenic effect of  $3\text{-}T_1\text{AM}$  is not caused by energy expenditure but rather is regulated on the hypothalamic level (21). Intraperitoneal or icv injection of low doses of  $3\text{-}T_1\text{AM}$  (4 and 1.2  $\mu\text{mol}$ /kg body weight, respectively) into rats or mice caused a significant increase in food intake without affecting oxygen consumption and locomotor activity. However, at high  $3\text{-}T_1\text{AM}$  doses (50 mg/kg body weight, ~127  $\mu\text{mol}$ ), the authors confirmed the previously reported reduction of oxygen consumption and locomotor activity (3). Stimulation of primary hypothalamic explants with  $3\text{-}T_1\text{AM}$  led to a significant increase of neuropeptide Y release, which might account for the increased food intake observed in the *in vivo* experiments.

#### J. Inhibition of monoamine transporters

In an attempt to elucidate the mechanisms associated with the *in vivo* effects of TAM, the interactions between TAMs and neuronal monoamine transporters were studied. These investigations were motivated by the presence of TAMs in brain and by their structural similarity to monoamine transmitters and trace amines (31). In heterologous expression systems, all TAMs except  $rT_3\text{AM}$  inhibited the activity of the plasma membrane human and rat dopamine transporter (DAT). Similarly, all TAMs except  $T_4\text{AM}$  inhibited the rat vesicular monoamine transporter 2 (VMAT2), which is not localized to the plasma

membrane but to the intracellular vesicular membrane. By contrast, the plasma membrane-bound human and rat serotonin transporter was inhibited exclusively by 3,3'-T<sub>2</sub>AM, but it was not affected by the remaining TAMs. Furthermore, the plasma membrane-bound human norepinephrine transporter (NET) exhibited a mixed behavior becoming activated by several TAMs and inhibited by others, including 3-T<sub>1</sub>AM. In these heterologous expression systems, 3-T<sub>1</sub>AM inhibited DAT, VMAT2, and NET at IC<sub>50</sub> values in the lower micromolar range and displaying either a competitive or a mixed mode of inhibition. In both the heterologous expression system and primary rat brain synaptosome or synaptic vesicle preparations, 3-T<sub>1</sub>AM was confirmed as an inhibitor and excluded as a substrate of DAT, VMAT2, and NET. Therefore, 3-T<sub>1</sub>AM is the only known endogenous phenethylamine identified to date that inhibits VMAT2 but fails to be recognized as a substrate. Taken together, the potencies of TAMs to inhibit monoamine transporters were comparable to the potencies of the biogenic trace amines, which also display IC<sub>50</sub> values in the lower micromolar range (31). Accordingly, the inhibition of DAT and NET by TAMs, which might lead to extracellular monoamine accumulation, and the inhibition of VMAT-2 by TAMs, which is likely to cause a depletion of neurotransmitter stores and subsequent reduction of further monoamine signaling, might have a physiological relevance (31).

## V. Receptors

To this end, the physiological receptor(s) of TAMs has not been identified unambiguously. Although some receptors have been excluded as candidates, some experimental evidence has been gathered for others to qualify as potential receptors mediating TAM signaling (1).

### A. Early descriptions of thyronamine binding sites

T<sub>4</sub>AM displaced <sup>125</sup>I-labeled T<sub>3</sub> or T<sub>4</sub> from binding to cytosolic and nuclear protein fractions obtained from human leukocytes at apparent K<sub>i</sub> values in the lower nanomolar range, *i.e.*, comparable to unlabeled T<sub>3</sub> and T<sub>4</sub>, respectively (32, 33). T<sub>3</sub>AM, 3,5-T<sub>2</sub>AM, and T<sub>0</sub>AM did not only interfere with ligand binding to  $\beta$ -adrenergic receptors expressed at the plasma membrane of turkey erythrocytes but also inhibited the downstream activation of cAMP synthesis (4, 8). Notably, these TAMs exhibited apparent K<sub>i</sub> values comparable to the K<sub>i</sub> of isoproterenol, which is a well-established  $\beta$ -adrenergic receptor ligand. By contrast T<sub>4</sub>, T<sub>3</sub>, rT<sub>3</sub>, and 3,3-T<sub>2</sub> failed to show any effect (4, 8). From these studies, it was concluded that T<sub>3</sub>AM, 3,5-T<sub>2</sub>AM, and T<sub>0</sub>AM bind to  $\beta$ -adrenergic receptors but do not activate cAMP signaling. Instead, they

prevented cAMP signaling by isoproterenol. However, in a more recent study, the application of 1  $\mu$ M isoproterenol to isolated, denervated *ex vivo* rat hearts pretreated with 38  $\mu$ M 3-T<sub>1</sub>AM caused a reversal of heart rate, cardiac output, and systolic aortic pressure to baseline, within 30 sec to 1 min. Accordingly, it was concluded that signaling via  $\beta_1$  adrenergic receptors is preserved in the presence of 3-T<sub>1</sub>AM (3). The reasons for the discrepancy between these studies remain elusive.

### B. Receptors for thyroid hormones and biogenic amines

The structural similarities of TAMs with THs and biogenic amines suggested that TAMs might signal via nuclear thyroid hormone receptors or receptors of biogenic amines. On the other hand, the rapid onset of TAM effects had not only led to their early classification as “non-genomic effects” but also motivated the proposal that TAMs might not signal via slowly acting nuclear thyroid hormone receptors (34).

In an early study, T<sub>3</sub>AM did not displace <sup>125</sup>I-T<sub>3</sub> from isolated rat liver nuclei (4). In line with this, T<sub>0</sub>AM and 3-T<sub>1</sub>AM were reported to neither bind to nor activate nuclear thyroid hormone receptors using nuclear receptor binding and reporter gene assays (3). Furthermore, neither T<sub>0</sub>AM nor 3-T<sub>1</sub>AM activated the heterologously expressed G<sub>αs</sub>-coupled dopamine D<sub>1</sub> and  $\beta_2$  adrenergic receptor (3).

Thus, despite their structural similarities, TAMs, THs, and certain biogenic amines appear to signal via different receptors.

### C. Trace amine-associated receptor 1

The first receptor suggested to mediate TAM effects was the membrane-bound G protein-coupled TAAR-1 (3). This suggestion was based on the finding that 3-T<sub>1</sub>AM, 3,3'-T<sub>2</sub>AM, 3,5-T<sub>2</sub>AM, T<sub>3</sub>AM, and T<sub>0</sub>AM stimulated the intracellular accumulation of cAMP in HEK-293 cells stably transfected with rat TAAR-1, with EC<sub>50</sub> values ranging from 14 to 131 nM with respect to the indicated order (3). Analysis of structure-activity relationships of single and double mutant rat and mouse TAAR-1 stably expressed in HEK-293 cells revealed surprisingly distinct, species-specific ligand preferences for a series of TAMs in comparison to 3-T<sub>1</sub>AM. Residues critical for the distinct, high-affinity ligand binding were identified in the transmembrane helices 4 and 7 of TAAR-1 of both species (35). Given the structural similarity between TAMs and biogenic amines, the expression of TAAR-1 transcript in TAM target tissues such as heart (11), brain (2), and pancreas (27), as well as the specific binding of [3-<sup>125</sup>I]T<sub>1</sub>AM to cardiac membrane preparations, TAAR-1 has been considered an excellent candidate receptor for T<sub>0</sub>AM and

3-T<sub>1</sub>AM (20). This notion was further supported by the observation that synthetic analogs of 3-T<sub>1</sub>AM exhibiting comparable or even higher potencies than 3-T<sub>1</sub>AM at activating heterologously expressed TAAR-1 also induced hypothermia after ip injection into mice (36). These synthetic derivatives included a 3-T<sub>1</sub>AM-like compound lacking the 4'-OH group, an N-methylated 3-T<sub>1</sub>AM derivative containing a fluorine atom instead of the 4'-OH group, and a derivative with a methyl group at the 3-position of the TAM scaffold.

However, the concept of TAM signaling via a G<sub>αs</sub>PCR, such as TAAR-1, has been challenged. In parallel experiments of the study by Scanlan *et al.* (3) using murine TAAR-1, only 3-T<sub>1</sub>AM and 3,5-T<sub>2</sub>AM activated cAMP accumulation at EC<sub>50</sub> values in the nanomolar range, whereas all other TAMs were unable to trigger cAMP synthesis at concentrations of 1 μM or less. Likewise, perfusion of isolated rat hearts with 3-T<sub>1</sub>AM did not increase intracardial cAMP level, although transcripts of several TAAR isoforms including TAAR-1 were detected in rat heart and specific binding of [3-<sup>125</sup>I]-T<sub>1</sub>AM to cardiac membrane preparations was observed (11). Moreover, the β-adrenergic receptor agonist isoproterenol, which increases the intracardial cAMP concentration upon activation of the cardiac β<sub>1</sub> adrenergic receptor, reversed the negative chronotropic and inotropic effects of 3-T<sub>1</sub>AM in the perfused rat heart (3). In line with this, T<sub>3</sub>AM, 3,5-T<sub>2</sub>AM, and T<sub>0</sub>AM inhibited the cAMP synthesis in turkey erythrocytes, which had been prestimulated with isoproterenol (4). Moreover, 3-T<sub>1</sub>AM did not have any effect on blood glucose and insulin levels in a mouse model carrying a G<sub>αi</sub>PCR knockout specific to pancreatic β-cells (27). *Bordetella pertussis* toxin, which ADP-ribosylates and uncouples all G<sub>αi</sub> proteins except G<sub>z</sub> from their upstream GPCRs, prevented the negative effect of 3-T<sub>1</sub>AM on the glucose-stimulated insulin release from primary murine and human pancreatic β-cells (27).

In conclusion, the hypothermic, negative chronotropic, negative inotropic, and hyperglycemic effects of 3-T<sub>1</sub>AM were more consistent with an inhibition of cAMP accumulation through G<sub>αi</sub> activation than with an effect on G<sub>αs</sub>. Yet, TAAR-1 has not been withdrawn as a candidate TAM receptor for several reasons. The observed pharmacological TAM effects may be secondary to the direct activation of TAAR-1 (3). Furthermore, although TAAR-1 couples to G<sub>αs</sub> in stably transfected HEK293 cells, it might couple differently in different tissues *in vivo* (3). However, in a *Xenopus* oocyte expression system in which the M2 muscarinic receptor readily coupled to G<sub>αi</sub>, no coupling of TAAR-1 to G<sub>αi</sub> was detected (27).

However, a recent report rejects the hypothesis that TAAR-1 mediates the thermoregulatory response to

3-T<sub>1</sub>AM and other trace amines (37). TAAR-1 knockout and wild-type male mice were used to prepare synaptosomes employed for binding and uptake assays, behavioral, and pharmacological studies with 3-T<sub>1</sub>AM in comparison to other trace amines and amphetamine-like psychostimulants. Experiments using cells transfected with rhesus monkey TAAR-1 and human DAT complemented these studies. Although 3-T<sub>1</sub>AM competed for DAT uptake as well as for serotonin uptake in these models, 3-T<sub>1</sub>AM-induced TAAR-1 signaling was not increased in DAT-transfected cells. Surprisingly, the previously demonstrated impressive hypothermic cryogenic response to 3-T<sub>1</sub>AM administration was maintained in TAAR-1 knockout mice to a similar extent and with the same dose response at 25 and 50 mg/kg (~70 and 140 μmol 3-T<sub>1</sub>AM/kg) body weight. Whether other members of the TAAR family or other plasma membrane receptors mediate this impressive cryogenic 3-T<sub>1</sub>AM response, therapeutically relevant for treatment of stroke, cardiovascular complications, and intensive care medicine, remains to be studied.

#### D. Alpha<sub>2A</sub> adrenergic receptor

A second receptor proposed to mediate the effects of 3-T<sub>1</sub>AMs was the α<sub>2A</sub> adrenergic receptor (Adra<sub>2A</sub>), which is an established G<sub>αi</sub> coupled receptor expressed in many cell types including pancreatic β-cells (27, 38). *In vitro* studies demonstrated a higher affinity of human and murine Adra<sub>2A</sub> for 3-T<sub>1</sub>AM compared with epinephrine, an accepted endogenous ligand of Adra<sub>2A</sub> (27). Coadministration of the Adra<sub>2A</sub> antagonist yohimbine with 3-T<sub>1</sub>AM to wild-type mice inhibited the hyperglycemic effects of 3-T<sub>1</sub>AM. Moreover, 3-T<sub>1</sub>AM had no effect on blood glucose and insulin levels in mice carrying a G<sub>αi</sub>PCR knockout specific to pancreatic β-cells and failed to induce hyperglycemia in Adra<sub>2A</sub>-null mice (27).

#### E. Concerted function of TAAR-1 and Adra<sub>2A</sub>?

So far, several lines of evidence indicate that Adra<sub>2A</sub> and TAAR-1 might play a concerted role in mediating the effects of 3-T<sub>1</sub>AM on carbohydrate metabolism. As described above, 3-T<sub>1</sub>AM inhibited the glucose-stimulated insulin release from primary murine and human pancreatic β-cells in a *Bordetella pertussis* toxin-sensitive fashion (27). However, 3-T<sub>1</sub>AM stimulated insulin secretion from the MIN6 insulinoma cell line, which expresses TAAR-1 and Adra2 in a reversed ratio compared with murine islets. This effect was potentiated by *Bordetella pertussis* toxin or the Adra2A antagonist yohimbine. Moreover, 3-T<sub>1</sub>AM did not only fail to induce hyperglycemia in Adra2A-null mice, but rather induced hypoglycemia (27). Taken together, 3-T<sub>1</sub>AM might activate insulin secretion in pan-



creatic  $\beta$ -cells via  $G_{\alpha s}$ -coupled TAAR-1 and inhibit it via  $G_{\alpha i}$ -coupled Adra2a. Consistent with this model, the Adra2 effect dominates in primary pancreatic  $\beta$ -cells, which express higher concentrations of Adra2A than TAAR-1. Likewise, the TAAR-1 effect dominates in MIN6 cells in which the TAAR-1 expression is higher relative to that of Adra2.

## VI. Signal Transduction Pathways Activated by Thyronamines

To assess the signaling pathways activated by TAMs more systematically, *ex vivo* adult rat working heart preparations, which had been pretreated with various inhibitors of signaling cascades, were perfused with  $T_0$ AM and 3- $T_1$ AM (11). Remarkably, *Bordetella pertussis* toxin, the aforementioned inhibitor of  $G_{\alpha i}$  signaling, did not interfere with the negative inotropic effects of  $T_0$ AM and 3- $T_1$ AM, thus excluding a role of  $G_{\alpha i}$  proteins for TAM effects on the heart. Likewise, inhibitors of various kinases, directed against protein kinase A, protein kinase C,  $Ca^{2+}$ -calmodulin kinase 2, phosphoinositide 3-kinase (PI3K), and MAPK2 did not show any effect. By contrast, the negative inotropic effects of 3- $T_1$ AM were potentiated by genistein, a tyrosine kinase inhibitor, and attenuated by vanadate, a phosphotyrosine phosphatase inhibitor (11). Because vanadate also acts as a P-type ATPase inhibitor and thus possesses intrinsic inotropic effects, it could not be concluded directly that 3- $T_1$ AM might signal by activating phosphotyrosine phosphatases. However, the detection of tyrosine phosphorylations and dephosphorylations in the cytosolic and microsomal fraction of rat ventricles perfused with 3- $T_1$ AM strengthened the hypothesis that 3- $T_1$ AM might signal via tyrosine phosphorylation and dephosphorylation pathways (11). In the same study,  $Ca^{2+}$  depletion or inhibition of phospholipase C also potentiated the negative inotropic effects of 3- $T_1$ AM, indicating a more complex signaling by TAMs (11).

## VII. Biosynthesis and Deiodination Reactions

The pharmacological effects reported for TAMs identified an interesting discrepancy between TAMs and classical THs. On the one hand, TAMs and THs are highly similar in physicochemical characteristics and structure (Fig. 1), but on the other hand the short-term hypothermic, negative chronotropic and negative inotropic effects of TAMs are opposite in direction to the actions of the classical active thyroid hormone  $T_3$  (1). Thus, TAMs were suggested to be derivatives of thyroid hormones that might serve to fine-tune or even antagonize thyroid hormone effects (39).

Yet, the pathways of TAM biosynthesis are still unknown. If TAMs were derivatives of TH (*e.g.*,  $T_4$  or  $T_3$ ), decarboxylation of the alanine side chain would be required for their biosynthesis (1). So far, no TH decarboxylating enzyme has been identified, although some preliminary evidence that  $T_4$  might be a substrate of aromatic L-amino acid decarboxylase has been reported since 1974 (4, 19).

This hypothesis could not yet be supported using human recombinant amino acid decarboxylase preparations and all THs as substrates, whereas its substrate L-DOPA (L-Dihydroxyphenylalanine) was readily decarboxylated to yield dopamine under comparable reaction conditions (Ref. 40 and our unpublished data).

If the putative decarboxylating enzyme was converting only THs with higher iodine content, deiodinases (Dio1, Dio2, and Dio3) would be directly required to complete 3- $T_1$ AM and  $T_0$ AM biosynthesis by removing at least one to four iodine atoms. Intracellular Dios catalyze the reductive removal of iodine from their substrates (41). Because a role of Dios in TAM biosynthesis requires their ability to accept TAMs as substrates, it was investigated whether TAMs are converted by Dios (14, 42). TAMs were incubated with isozyme-specific Dio preparations. Deiodination products were analyzed using a newly established method applying LC-MS/MS. Phenolic ring deiodinations of  $rT_3$ AM, 3',5'- $T_2$ AM, 3,3'- $T_2$ AM, as well as tyrosyl ring deiodinations of  $T_3$ AM and 3,5- $T_2$ AM were observed with Dio1. These reactions were completely inhibited by the Dio1-specific inhibitor 6n-propyl-2-thiouracil. Dio2-containing preparations also deiodinated  $rT_3$ AM and 3',5'- $T_2$ AM at the phenolic rings, but in a 6n-propyl-2-thiouracil-insensitive fashion. All TAMs with tyrosyl ring iodine atoms were deiodinated at the tyrosyl ring by Dio3-containing preparations. In functional competition assays, the newly identified TAM substrates inhibited an established TH deiodination reaction. By contrast, TAMs, which had been excluded as Dio substrates in LC-MS/MS experiments, failed to show any effect in the competition assays, thus excluding them as substrates and verifying the former results.

These data support a role for Dios in TAM biosynthesis and contribute to confining the biosynthetic pathways for 3- $T_1$ AM and  $T_0$ AM (Fig. 3) (14).

## VIII. Metabolism

### A. First findings

The first study analyzing potential metabolizing reactions of TAMs (43) was motivated by previous experiments demonstrating that ip injection of a synthetic 3- $T_1$ AM derivative lacking the 4'-OH group into

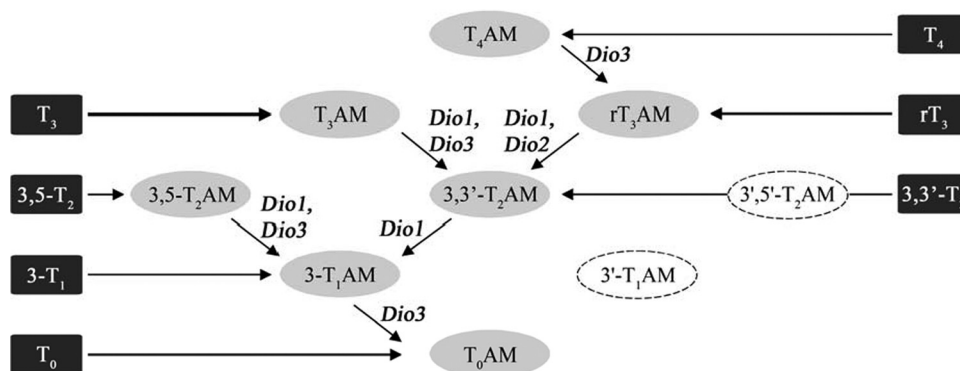

**FIG. 3.** Pathways suggested for TAM biosynthesis. *Diagonal arrows*, Phenolic ring deiodination reactions catalyzed by Dio1 or Dio2 and tyrosyl ring deiodination reactions catalyzed by Dio1 or Dio3. *Horizontal arrows*, Putative decarboxylation reactions that might represent the first step of TAM biosynthesis. *Dashed lines*, TAMs that have been excluded as precursors of the biosynthesis of 3- $T_1AM$  and  $T_0AM$ .

C57BL/6 wild-type mice caused a rapid and pronounced decrease in body temperature (from 36.7 C to ~23.6 C within 120 min) but also toxic effects, such as stiffening of hind limbs, leading to death 24 h after injection (36). Similarly, an N-methylated 3- $T_1AM$  derivative containing a fluorine atom instead of the 4'-OH group caused hypothermia comparably with 3- $T_1AM$  but concomitant toxic effects within 1 wk. Other synthetic 3- $T_1AM$  derivatives that were even as potent as 3- $T_1AM$  at activating heterologously expressed TAAR-1 caused similar hypothermic effects but no toxicity. Taken together, among the compounds studied, those lacking the 4'-OH group exhibited toxicity. Considering that the 4'-OH group represents a target site of sulfation and glucuronidation, it was hypothesized that the lack of 4'-OH might prevent sulfation and glucuronidation of the compounds and thus impair their clearance, which may be a factor in the observed toxicity (36).

### B. Sulfation

$T_0AM$  and 3- $T_1AM$ , which are present *in vivo*, but also  $T_3AM$  were found to be readily sulfated by distinct human liver sulfotransferase (SULT) isoforms (43). Moreover, 3- $T_1AM$  was sulfated by homogenates of human brain and cardiac tissue, *i.e.*, target tissues of TAM action. These SULT actions might serve to attenuate and thus regulate TAM action (43).

### C. Oxidative deamination

3- $T_1AM$  and  $T_3AM$  were also found to be subject to oxidative deamination of the ethylamine side chain yielding thyroacetic acids (7). This represents yet another alternate pathway of TH metabolism (44, 45). 3- $T_1AM$  and  $T_3AM$  were converted to their respective thyroacetic acids ( $TA_1$  and  $TA_3$ ) by cultured cells, tissue homogenates, and *in vivo*. These reactions were catalyzed by an amine oxidase activity and were inhibited by the monoamine oxidase and semicarbazide-sensitive amine oxidase inhibitor iproniazid (44).

The biological activity of  $TA_1$  is unknown, so far. Taken together, there is evidence suggesting that sulfation and oxidative deamination are relevant reactions of TAM metabolism. So far, no evidence has become available for 4'-O-methylation or glucuronidation of TAMs.

## IX. Cellular Uptake and Transport

3- $T_1AM$  has recently been found to be transported into a variety of cell types via a specific transport mechanism that can be saturated and inhibited (46). To identify the putative 3- $T_1AM$  transporter(s), a systematic large-scale screening analysis of the solute carrier transporter family was performed. No single specific TAM transporter was identified from this screen; however, the sodium- and chloride-independent, pH-dependent, TAM-specific intracellular transport may involve multiple transporters, eight of which were characterized in more detail (46).

The hypothesized receptors, biosynthesizing and/or metabolizing enzymes, and transporters of TAMs are summarized in Table 2.

## X. Therapeutic Applications

Although their physiological function remains elusive, 3- $T_1AM$  and  $T_0AM$  have already revealed promising therapeutic potential. In one study published so far, 3- $T_1AM$  and  $T_0AM$  were used successfully to treat experimentally induced stroke (Fig. 4) (20). In adult C57BL/6 mice injected ip with 50 mg/kg 3- $T_1AM$  or  $T_0AM$  either 1 h after or 2 d before the experimental induction of stroke, the infarct volumes were reduced compared with vehicle-treated control mice. The effect was abolished when the TAM-treated mice were placed on a heat pad, indicating that the neuroprotective effect of TAMs required the induction of hypothermia. This study was the first to apply

**TABLE 2.** Summary of hypothesized receptors, biosynthesizing and/or metabolizing enzymes, and transporters of TAMs

|                                                                                                   | Experimental model                                                   | Mechanism and/or interpretation                                                                                                                                                      | Refs.         |
|---------------------------------------------------------------------------------------------------|----------------------------------------------------------------------|--------------------------------------------------------------------------------------------------------------------------------------------------------------------------------------|---------------|
| <b>Receptors</b>                                                                                  |                                                                      |                                                                                                                                                                                      |               |
| TAAR-1                                                                                            | Transfected cell lines, isolated rat hearts                          | Intracellular cAMP accumulation                                                                                                                                                      | 3, 11, 27, 35 |
| Adra2A                                                                                            | Cell lines, Adra2A-null mice                                         | May modulate effects on metabolism                                                                                                                                                   | 27, 38        |
| Signal transduction                                                                               | <i>Ex vivo</i> adult rat working heart                               | Tyrosine phosphorylation and dephosphorylation pathways                                                                                                                              | 11            |
| <b>Biosynthesis and metabolism</b>                                                                |                                                                      |                                                                                                                                                                                      |               |
| Deiodination (Dio1, Dio2, Dio3)                                                                   | Cell lines                                                           | May be involved in TAM biosynthesis, provided that TAMs are formed by decarboxylation of THs with $\geq 2$ iodine atoms per molecule                                                 | 14            |
| Oxidative deamination (MAO, SSAO)                                                                 | Cell lines, homogenates of human thyroids                            | May serve as precursors in the biosynthesis of thyroacetic acids (e.g., TA <sub>1</sub> , triac)                                                                                     | 44            |
| Sulfation (SULT1A1, SULT1A3, SULT1E1)                                                             | Transfected cell lines, homogenates of human liver, brain, and heart | May deactivate TAMs and thus attenuate TAM effects                                                                                                                                   | 43            |
| <b>Transporters</b>                                                                               |                                                                      |                                                                                                                                                                                      |               |
| Hypothesized transporters (SLC7A1, SLC16A7, SLC17A5, SLCO3A1, SLCO4A1, SLC29A2, SLC31A1, SLC43A3) | Transfected cell lines, siRNA screening                              | Uptake of 3-T <sub>1</sub> AM occurs in multiple cell types, uptake properties identified, so far: specific, saturable, inhibitable, pH-dependent, sodium- and chloride- independent | 46            |

MAO, Monoamine oxidase; SSAO, semicarbazide-sensitive amine oxidase; SLC, solute carrier family; siRNA, small interfering RNA.

endogenous compounds to induce hypothermia as a treatment of stroke that might be expected to cause fewer side effects than synthetic compounds (20). Moreover, it reported the first evidence that a cryogen, namely 3-T<sub>1</sub>AM, may be prophylactically administered in situations of an anticipated ischemic injury (20).

## XI. Thyronamines in Comparison to Other Recently Characterized TH Metabolites and Their Targets

During the last few years, the classical concept of mechanism of TH action has experienced significant expansion and modifications. Apart of the well-documented and most prevailing mechanism of action of the thyromimetic ligand T<sub>3</sub>, which acts by modulating the activities of nuclear T<sub>3</sub> receptors (TRs) TR $\alpha$ 1, TR $\beta$ 1, and TR $\beta$ 2, several

other TH-related effects were described and were supported by convincing experimental evidence (Fig. 5) (for recent reviews, see Refs. 47–50).

### A. Mitochondrial TR $\alpha$ 1 and effects of 3,5-T<sub>2</sub>

A TR $\alpha$ 1 variant lacking the N-terminal A/B domains and thus the nuclear location signal is found in mitochondria (Table 3), acting there as a *bona fide* TR transcription factor for mitochondrial circular DNA, which contains T<sub>3</sub>-responsive elements (47, 51). Apart from transcription modulation, this TR form is also involved in regulation of the mitochondrial proton gradient and Ca<sup>2+</sup> mediated signaling. Mitochondrial biogenesis, ATP generation, and energy metabolism have been known for decades to be regulated by TH status. T<sub>3</sub>-mediated effects on various mitochondrial targets and reactions have been established, and strong evidence has been presented that 3,5-T<sub>2</sub> is a powerful TH metabolite tar-

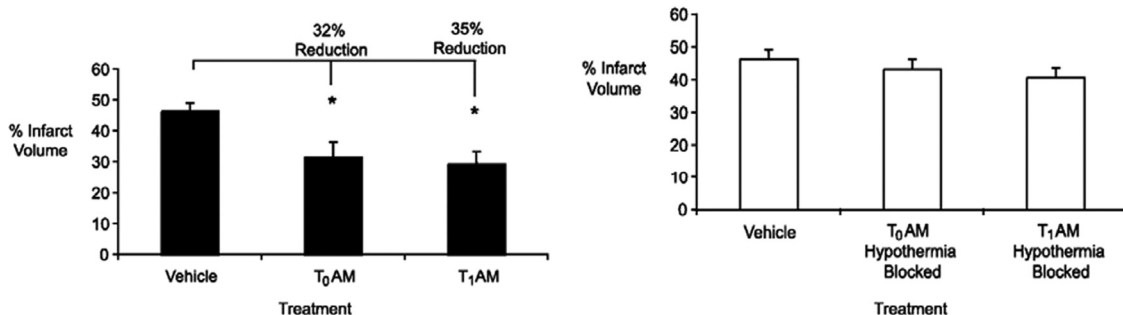

**FIG. 4.** Infarct volume (percentage of ipsilateral hemisphere) after treatment with 3-T<sub>1</sub>AM and T<sub>0</sub>AM following middle cerebral artery occlusion (left) and under conditions of hypothermia blocked (n = 8 per group). Error bars represent SEM. \*, P < 0.05 compared with vehicle-injected. [Reprinted with permission from K. P. Doyle et al.: *Stroke* 38:2569–2576, 2007 (20). Copyright American Heart Association, Inc.]

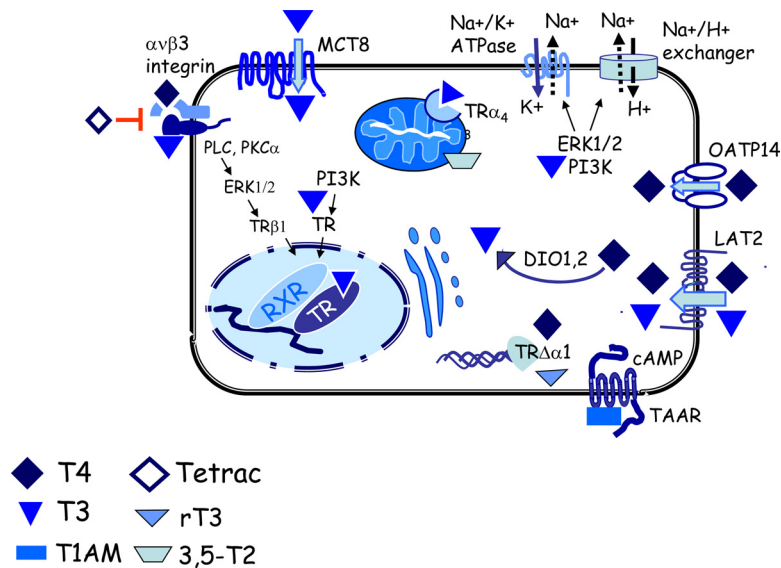

**FIG. 5.** Schematic overview of effects and target molecules involved in mechanisms of action of thyroid hormones  $T_4$  and  $T_3$  and their metabolites, Tetrac,  $rT_3$ , 3,5- $T_2$ , and 3- $T_1AM$ . DIO1,2, Type 1 and type 2 Dio; LAT2, L-type amino acid transporter 2; MCT8, monocarboxylate transporter 8; OATP14, organic anion transporter 14; PKC, protein kinase C; PLC, phospholipase C; RXR, retinoic acid X receptor;  $TR_{\alpha 43}$ , mitochondrial form of  $TR_{\alpha}$ .

getting mitochondrial function (for reviews, see Refs. 48 and 52). 3,5- $T_2$  in rather high concentrations (25  $\mu\text{g}/100$  g body weight) rapidly stimulates basal metabolic rate and oxidative capacity in hypothyroid rats, and these effects neither require *de novo* protein biosynthesis nor lead to thyrotoxic cardiac effects, well known for  $T_3$  administration in high concentration. In rodents fed on high-fat diets, 3,5- $T_2$  also prevents obesity by activating AMP-kinase, which mediates this remarkable stimulation of thermogenesis and mitochondrial fatty acid oxidation in skeletal muscle (52). 3,5- $T_2$  stimulates flavin-adenin-dinucleotide, reduced form ( $\text{FADH}_2$ )-linked mitochondrial respiratory pathways and alters lipid partitioning by enhancing mitochondrial import and oxidation of long-chain fatty acids. Whether such effects are also observed in euthyroid animals or obese humans remains to be studied. The 3,5- $T_2$  effects resembling mitochondrial uncoupling in rat muscle and leading to decreased efficiency of energy utilization appear not to be mediated by altered expression of the uncoupling proteins (UCPs) UCP2 or UCP3 (53). Partial uncoupling and decreased  $\text{H}^+$ /electron stoichiometry had been assigned to binding of 3,5- $T_2$  to cytochrome c-oxidase subunits, which alters the function of this element of the respiratory chain (48). These effects are distinct from the well-known  $TR_{\beta}$ -mediated stimulatory effect of  $T_3$  on UCP1 in brown adipose tissue (54), which involves induction of the gene by synergistic action of  $\beta_3$ -adrenergic stimulation of cAMP production and induction of Dio2. Modulation of this interaction occurs by additional stimulation of Dio2 by bile acid-mediated activation of the TGR5 (Gpbar-1) plasma membrane GPCR in brown adipocytes and myocytes (55).

## B. Plasma membrane-mediated effects of $T_4$ , $T_3$ , and Tetrac

The TH effects described above are obviously opposite to the rapid cryogenic action of 3- $T_1AM$  (37). Rapid plasma membrane-initiated effects of THs and their metabolites have also been observed during development in chicken hepatocytes and various rodent and human cells, including cancer cells (49). Rapid modulation of activity of  $\text{Na}^+, \text{K}^+$ -ATPase, both activation and inhibition depending on cell type and developmental stage (56), has been reported for  $T_3$ . However,  $T_4$  and 3,5- $T_2$  also exert such effects. Evidence presented so far indicates that this fast activation involves cytosolic kinase signaling cascades such as ERK1/2 and PI3K. Whether these direct effects on  $\text{Na}^+, \text{K}^+$ -ATPase are mediated by TH binding to the plasma membrane  $\alpha v \beta 3$  integrin receptor or depend on a membrane-associated or cytosolic TR form that is known to interact with PI3K (57) requires further study. Apart from  $\text{Na}^+, \text{K}^+$ -ATPase, the  $\text{Na}^+/\text{H}^+$  exchanger and the  $\text{Na}^+$ -dependent amino acid transport system A are rapidly modulated in their activity by  $T_4$ ,  $T_3$ , and to some extent also by  $rT_3$  and 3,5- $T_2$  (49). The major cellular target initiating these effects appears to be the  $\alpha v \beta 3$  integrin receptor, which exhibits distinct binding sites for  $T_4$ ,  $T_3$ , and Tetrac. This membrane-initiated signaling requires propagation of the signal by phospholipase C, protein kinase C, Src, or MAPK pathways. The  $T_4$  binding site on the  $\alpha v \beta 3$  integrin receptor, which is located at the RGD peptide recognition site, shows high  $T_4$  affinity in the range of free  $T_4$  serum concentrations, whereas that of  $T_3$  requires supraphysiological serum concentrations. Surprisingly, Tetrac, the deaminated  $T_4$  metabolite circulating in serum in concentrations comparable to those of  $T_3$ , antagonized these effects of  $T_4$  and  $T_3$ . Beyond that, Tetrac also blocks integrin-signaling cross talk with other cellular pathways. One final endpoint of action is enhanced angiogenesis, also in the absence of  $T_4$  or  $T_3$  stimulation (49, 50, 58).  $T_4$  stimulation of integrin signaling also increases proliferation of various tumor cells, and again this effect can be efficiently blocked by Tetrac on Tetrac-nanoparticles, which do not enter cells.

Neuronal migration, guided by laminin on glial cells, is affected by  $rT_3$  involving a mechanism associated with polymerization of F-actin, and again this rapid effect ex-

Neuronal migration, guided by laminin on glial cells, is affected by  $rT_3$  involving a mechanism associated with polymerization of F-actin, and again this rapid effect ex-

**TABLE 3.** Overview of targets and effects of natural endogenous and thyroid hormone metabolites as well as synthetic analogs

| Tissue/serum concentration                                                       | Target structure, receptor, protein                                                                             | Relevant target organs/cells                                                              | Major biological or pharmacological effects                                                                                                              | Refs.        |
|----------------------------------------------------------------------------------|-----------------------------------------------------------------------------------------------------------------|-------------------------------------------------------------------------------------------|----------------------------------------------------------------------------------------------------------------------------------------------------------|--------------|
| 3,5,3',5'-Levo-tetraiodothyronine (L-T <sub>4</sub> ) (nM to pM)                 | Plasma membrane ion pores (Na <sup>+</sup> /K <sup>+</sup> -ATPase, Na <sup>+</sup> /H <sup>+</sup> -exchanger) | Erythrocytes, hepatocytes, several cell types                                             | Rapidly altered signal transduction; control of proliferation and differentiation                                                                        | 49, 56       |
|                                                                                  | $\alpha\nu\beta 3$ integrin                                                                                     | Several cell types (endothelium, vascular smooth muscle cells, cancer cells, osteoclasts) | Activation of MAPK, angiogenesis, cell proliferation, bone metabolism                                                                                    | 49, 50       |
|                                                                                  | ERK1/2<br>PI3K<br>F-actin                                                                                       | Developing cerebellum, astrocytes                                                         | Neuronal migration under glial guidance                                                                                                                  | 59           |
|                                                                                  | TR $\alpha$ , TR $\beta$                                                                                        | Whole body                                                                                | Permissive and direct effects, basal metabolic rate, growth, differentiation                                                                             | 47           |
| 3,5,3'-Levo-triiodothyronine (L-T <sub>3</sub> ) (nM to pM)                      | Plasma membrane receptors ( $\alpha\nu\beta 3$ integrin)                                                        | Several cell types including tumor cells                                                  | PI3K activation, TR $\alpha 1$ translocation, HIF1 $\alpha$ induction; rapidly altered signal transduction; control of proliferation and differentiation | 49, 74       |
|                                                                                  | Dio1, Dio3                                                                                                      | Many cells                                                                                | Competing for extrathyroidal T <sub>3</sub> production, Dio inhibitor                                                                                    | 50, 75       |
| 3,3',5'-Levo-triiodothyronine (reverse-T <sub>3</sub> , L-rT <sub>3</sub> ) (pM) | Plasma membrane receptors ( $\alpha\nu\beta 3$ integrin)                                                        | Several cell types                                                                        | Activation of several cytosolic kinase pathways                                                                                                          | 59           |
|                                                                                  | TR $\Delta\alpha 1$                                                                                             | Astrocytes<br>Liver                                                                       | F-actin polymerization                                                                                                                                   | 53           |
| 3,5-Diiodo-L-thyronine (3,5-T <sub>2</sub> ) ( $\mu$ M to nM)                    | Cytochrome c oxidase subunits                                                                                   | Liver                                                                                     | Enhanced fatty acid oxidation and carnitine palmitoyl transferase activity                                                                               | 48, 53       |
|                                                                                  | AMP-kinase                                                                                                      | Skeletal muscle                                                                           | Enhanced thermogenesis and basal metabolic rate in hypothyroid rats                                                                                      | 52           |
|                                                                                  | $\alpha\nu\beta 3$ integrin (inhibitor)                                                                         |                                                                                           | Angiogenesis                                                                                                                                             | 50           |
| Tetraiodothyroacetic acid (Tetrac)                                               | $\alpha\nu\beta 3$ integrin (inhibitor)                                                                         |                                                                                           | Angiogenesis                                                                                                                                             | 50           |
| Triiodothyroacetic acid (Triac)                                                  | TR $\beta 2$                                                                                                    | Anterior pituitary<br>Liver<br>Bone                                                       | TSH suppression<br>Cholesterol lowering<br>Bone loss                                                                                                     | 48, 76<br>66 |
|                                                                                  | $\beta$ -adrenergic receptor<br>Dopamine receptor                                                               | Turkey erythrocytes                                                                       | Antagonist<br>Reduced dopamine requirement in intensive care patients                                                                                    | 4<br>8       |
| TAMs (3-T <sub>1</sub> AM/T <sub>0</sub> AM) (pmol/g or nM)                      | See Table 2                                                                                                     | See Table 1                                                                               | See Table 1                                                                                                                                              |              |
| GC-1                                                                             | TR $\beta$                                                                                                      |                                                                                           | Partially similar to T <sub>3</sub>                                                                                                                      | 77           |
|                                                                                  | $\alpha\nu\beta 3$ integrin                                                                                     |                                                                                           | Angiogenesis                                                                                                                                             | 78           |
| Eprotirome (KB2115)                                                              | Hepatic TR $\beta 1$                                                                                            | Liver                                                                                     | Decreases atherogenic lipoproteins                                                                                                                       | 71, 72       |
|                                                                                  | TR                                                                                                              | Several cell types                                                                        | Partially similar to T <sub>3</sub>                                                                                                                      |              |
| 3,5-Diiodothyropropionic acid (DITPA)                                            | $\alpha\nu\beta 3$ integrin                                                                                     |                                                                                           | Angiogenesis                                                                                                                                             | 50, 61, 79   |
|                                                                                  | TR                                                                                                              | Heart                                                                                     | Congestive heart failure                                                                                                                                 |              |
| D-Thyroxine/D-triiodothyronine (D-T <sub>4</sub> /D-T <sub>3</sub> )             | TR                                                                                                              | Liver, adipocytes                                                                         | Lipolysis                                                                                                                                                | 68           |

erted by T<sub>4</sub> and rT<sub>3</sub> but not by T<sub>3</sub> involves  $\alpha\nu\beta 3$  receptor signaling sensitive to RGD interference (47, 59). Rapid  $\alpha\nu\beta 3$  integrin receptor-initiated and RGD sensitive T<sub>4</sub> and T<sub>3</sub> effects have also been reported for bone cells (60) and were related to osteoblast proliferation and T<sub>3</sub>-sensitive demineralization of the bone.

The remarkable rapid effects of Tetrac (inhibitory) and T<sub>4</sub> and to a lesser extent T<sub>3</sub> (stimulatory) on angiogenesis during development and in tumors open novel routes toward targeted therapies involving innovative formulations of TH-derived metabolites, *e.g.*, nanoparticulate Tetrac (50). Whether endogenous Tetrac is also involved in

the regulation of angiogenesis remains to be studied. Currently, no data are available to suggest a contribution of T<sub>4</sub>AM or T<sub>3</sub>AM in this context, either as potential intermediates formed from T<sub>4</sub> by decarboxylation and further metabolized to Tetrac or Triac (tiratricol) by oxidative deamination or as TH-derived ligands rapidly activating  $\alpha\nu\beta 3$  integrin receptors. It might well be that various metabolites generated from the amino acid-derived T<sub>4</sub> and T<sub>3</sub>, the main secretory products of the thyroid gland, are specifically formed by enzymatic processes in particular tissues during developmental, physiological, or pathophysiological conditions. They may thus expand the repertoire of possibilities to modulate and fine-tune metabolic processes and pathways sensitive to and dependent on thyroid hormone-derived signaling compounds such as Tetrac, rT<sub>3</sub>, 3,5-T<sub>2</sub>, and 3-T<sub>1</sub>AM.

## **XII. Novel Synthetic Analogs of Thyroid Hormones, Specific Ligands, DITPA, and Eprotirome, Specific Ligands for T<sub>3</sub> Receptor Isoforms**

Although currently no clinically relevant synthetic analogs of T<sub>4</sub>, Tetrac, rT<sub>3</sub>, 3,5-T<sub>2</sub>, or 3-T<sub>1</sub>AM are administered in (pre-)clinical trials, several T<sub>3</sub> analogs selective for the TR isoforms TR $\alpha$ 1, TR $\beta$ 1, or TR $\beta$ 2 have been tested at various stages (Table 3). 3,5-Diiodothyroproionic acid (DITPA) has recently received high interest as a potent TR ligand that does not require cellular uptake by the plasma membrane T<sub>3</sub> transporter MCT8 and thus might reach relevant neuronal targets during development in patients with X-linked Allan-Herndon-Dudley syndrome via other TH transporters. Apart from its classical TR agonistic metabolic effects, DITPA has also been used experimentally as a powerful ligand for the rapid plasma membrane-initiated TH effects on angiogenesis, on cardiac remodeling after infarction, and in ischemia models (58, 61, 62).

The successful administration of Triac has been reported for patients with pituitary and general resistance to thyroid hormone due to mutations of TR $\beta$  (63–65). Triac and similarly D-T<sub>4</sub> have also been used as cholesterol- and lipid-lowering drugs (66), but long-term administration resulted in adverse effects on bone metabolism and density (Triac) (67) or cardiac problems (D-T<sub>4</sub>) (68). Several TR $\alpha$ - or TR $\beta$ -selective ligands, both agonists and antagonists, have been developed and tested in cellular and animal experimental models (69, 70). A number of x-ray structures and detailed structural models of the TR ligand binding sites with various ligands have been published, and some compounds such as the T<sub>3</sub> mimetic compound eprotirome (KB2115) have been reported to effectively de-

crease plasma low-density lipoprotein cholesterol and to stimulate bile acid synthesis in humans (71). Remarkably, these beneficial effects of this TR $\beta$ -selective ligand occur without cardiac effects under dosages administered. Even more promising are recent reports on this novel drug demonstrating significant dose-dependent reduction in several atherogenic lipoproteins [low-density lipoprotein cholesterol, apolipoprotein B, Lp(a) lipoprotein] and triglycerides in patients after 12 wk of treatment that was administered in addition to the state-of-the-art statin therapy (72). These alterations occurred without change in serum TSH and T<sub>3</sub> levels and with only minor decreases in total and free T<sub>4</sub> levels, and they did not result in a compensatory increase in serum TSH during the intervention period. No adverse eprotirome effects on cardiac or bone parameters were observed, and free fatty acid levels were not increased. Obviously, it might be very interesting to know whether circulating serum levels of rT<sub>3</sub>, Tetrac, 3,5-T<sub>2</sub>, or 3-T<sub>1</sub>AM are affected by eprotirome administration. More details of eprotirome effects on respiratory coefficient, lipid compartmentation, and subcellular partitioning as well as fatty acid *vs.* glucose oxidation might especially be required to compare the action of this T<sub>3</sub>-agonist targeting hepatic TR $\beta$ 1 with the unique metabolic and cryogenic impact of administration of 3-T<sub>1</sub>AM in various animal models.

## **XIII. Conclusions**

3-T<sub>1</sub>AM and T<sub>0</sub>AM have recently been identified as endogenous signaling molecules exhibiting remarkable *in vivo* effects, such as rapid and profound hypothermia, hyperglycemia, reduction of the RQ, negative chronotropy, and negative inotropy (3, 6). So far, basically all fields of TAM biology appear insufficiently characterized and are in need of further research. It is not known whether further representatives of TAMs apart from 3-T<sub>1</sub>AM and T<sub>0</sub>AM are present *in vivo* and, if so, which tissue concentrations and half-lives they display. It remains equally elusive whether the aforementioned *in vivo* effects represent the physiological TAM actions or are merely pharmacological in nature. Moreover, the physiological receptor(s) of TAMs remain to be identified unequivocally.

Recent findings, which have not been published in peer-reviewed journals yet, suggest that TAM total serum concentrations are orders of magnitude higher than previously reported, depending on how the sample is processed before analysis (12, 73). Possibly, the strong binding of 3-T<sub>1</sub>AM to apolipoprotein B100 has to be taken into account for systematic blood sample workup.

Additional unsettled issues include the sites, pathways, and regulation of TAM biosynthesis, their transport in

blood and across biological membranes, as well as possible pathophysiological and therapeutic implications. Yet, their presence in tissues and serum is established, and so is their interesting and promising pattern of biological effects.

## Acknowledgments

We thank Prof. Dr. Lutz Schomburg for his critical evaluation of the manuscript.

Address all correspondence and requests for reprints to: Josef Köhrle, Institut für Experimentelle Endokrinologie und Endokrinologisches Forschungs-Centrum Charité-EnForCé, Charité-Universitätsmedizin Berlin, Charité Campus Virchow-Klinikum (Südring 10), Augustenburger Platz 1, 13353 Berlin, Germany. E-mail: josef.koehrle@charite.de.

This work was supported by grants from the Deutsche Forschungsgemeinschaft (DFG Graduiertenkolleg 1208, TP3; to J.K.) and the Charité Universitätsmedizin Berlin (to J.K.). This review contributes in part to the Ph.D. thesis of C.S.H.

Disclosure Summary: S.P., C.S.H., and J.K. have nothing to disclose. T.S.S. is an inventor on United States Patents 6,979,750 B1; 7,339,079 B2; and 7,355,079 B2.

## References

- Scanlan TS 2009 Minireview: 3-iodothyronamine (T1AM): a new player on the thyroid endocrine team? *Endocrinology* 150:1108–1111
- Zucchi R, Chiellini G, Scanlan TS, Grandy DK 2006 Trace amine-associated receptors and their ligands. *Br J Pharmacol* 149:967–978
- Scanlan TS, Suchland KL, Hart ME, Chiellini G, Huang Y, Kruzich PJ, Frascarelli S, Crossley DA, Bunzow JR, Ronca-Testoni S, Lin ET, Hatton D, Zucchi R, Grandy DK 2004 3-Iodothyronamine is an endogenous and rapid-acting derivative of thyroid hormone. *Nat Med* 10:638–642
- Cody V, Meyer T, Dohler KD, Hesch RD, Rokos H, Marko M 1984 Molecular structure and biochemical activity of 3,5,3'-triiodothyronamine. *Endocr Res* 10:91–99
- DeBarber AE, Geraci T, Colasurdo VP, Hackenmueller SA, Scanlan TS 2008 Validation of a liquid chromatography-tandem mass spectrometry method to enable quantification of 3-iodothyronamine from serum. *J Chromatogr A* 1210:55–59
- Braulke LJ, Klingenspor M, DeBarber A, Tobias SC, Grandy DK, Scanlan TS, Heldmaier G 2008 3-Iodothyronamine: a novel hormone controlling the balance between glucose and lipid utilisation. *J Comp Physiol B* 178:167–177
- Hillmann G, Keil B, Taslimi P 1958 [Determination of thyroxamine in the thyroid gland and plasma.]. *Z Naturforsch B* 13B:820–821
- Meyer T, Hesch RD 1983 Triiodothyronamine—a  $\beta$ -adrenergic metabolite of triiodothyronine? *Horm Metab Res* 15:602–606
- Hillmann G, Keil B 1961 [The distribution of I-131-labelled thyroxamine in the body of the rat.]. *Z Gesamte Exp Med* 134:380–382
- Pinna G, Brödel O, Visser T, Jeitner A, Grau H, Eravci M, Meinhold H, Baumgartner A 2002 Concentrations of seven iodothyronine metabolites in brain regions and the liver of the adult rat. *Endocrinology* 143:1789–1800
- Chiellini G, Frascarelli S, Ghelardoni S, Carnicelli V, Tobias SC, DeBarber A, Brogioni S, Ronca-Testoni S, Cerbai E, Grandy DK, Scanlan TS, Zucchi R 2007 Cardiac effects of 3-iodothyronamine: a new aminergic system modulating cardiac function. *FASEB J* 21:1597–1608
- Geraci T, Fjeld C, Colasurdo V, Samuels M, Schuff K, Scanlan T 3-Iodothyronamine (T1AM) levels in human serum and tissue. Proc 79th Annual Meeting of the American Thyroid Association, Chicago, IL, 2008 (Abstract)
- Soldin O, Gu J, Soldin SJ Thyronamines: tandem mass spectrometry quantification in biological fluids. Proc 80th Annual Meeting of the American Thyroid Association, Palm Beach, FL, 2009, pp S-114 (Abstract 37)
- Piehl S, Heberer T, Baliz G, Scanlan TS, Smits R, Koksch B, Köhrle J 2008 Thyronamines are isozyme-specific substrates of deiodinases. *Endocrinology* 149:3037–3045
- Benvenega S, Gregg RE, Robbins J 1988 Binding of thyroid hormones to human plasma lipoproteins. *J Clin Endocrinol Metab* 67:6–16
- Harington C, Thibault O 1953 [Comparison of the sensitizing activity of triiodothyronine and thyroxine as well as their corresponding amines.]. *C R Seances Soc Biol Fil* 147:78–81
- Thibault O 1957 [Action of tri- and tetraiodothyropyruvic acids on oxygen consumption in euthyroid rat.]. *C R Seances Soc Biol Fil* 151:475–479
- Tomita K, Lardy HA 1956 Synthesis and biological activity of some triiodinated analogues of thyroxine. *J Biol Chem* 219:595–604
- Dratman MB 1974 On the mechanism of action of thyroxine, an amino acid analog of tyrosine. *J Theor Biol* 46:255–270
- Doyle KP, Suchland KL, Ciesielski TM, Lessov NS, Grandy DK, Scanlan TS, Stenzel-Poore MP 2007 Novel thyroxine derivatives, thyronamine and 3-iodothyronamine, induce transient hypothermia and marked neuroprotection against stroke injury. *Stroke* 38:2569–2576
- Dhillon WS, Bewick GA, White NE, Gardiner JV, Thompson EL, Bataveljic A, Murphy KG, Roy D, Patel NA, Scutt JN, Armstrong A, Ghatei MA, Bloom SR 2009 The thyroid hormone derivative 3-iodothyronamine increases food intake in rodents. *Diabetes Obes Metab* 11:251–260
- Ghelardoni S, Suffredini S, Frascarelli S, Brogioni S, Chiellini G, Ronca-Testoni S, Grandy DK, Scanlan TS, Cerbai E, Zucchi R 2009 Modulation of cardiac ionic homeostasis by 3-iodothyronamine. *J Cell Mol Med* 13:3082–3090
- Zucchi R, Ghelardoni S, Chiellini G 2010 Cardiac effects of thyronamines. *Heart Fail Rev* 15:171–176
- Saba A, Chiellini G, Frascarelli S, Marchini M, Ghelardoni S, Raffaelli A, Tonacchera M, Vitti P, Scanlan TS, Zucchi R 2010 Tissue distribution and cardiac metabolism of 3-iodothyronamine. *Endocrinology* 151:5063–5073
- Boissier JR, Giudicelli JF, Larno S, Advenier C 1973 Differential inotropic—chronotropic action of thyronamine. *Eur J Pharmacol* 22:141–149
- Côté P, Polumbo RA, Harrison DC 1974 Thyronamine, a new inotropic agent: its cardiovascular effects and mechanism of action. *Cardiovasc Res* 8:721–730
- Regard JB, Kataoka H, Cano DA, Camerer E, Yin L, Zheng YW, Scanlan TS, Hebrok M, Coughlin SR 2007 Probing cell

- type-specific functions of Gi in vivo identifies GPCR regulators of insulin secretion. *J Clin Invest* 117:4034–4043
28. Klieverik LP, Foppen E, Ackermans MT, Serlie MJ, Sauerwein HP, Scanlan TS, Grandy DK, Fliers E, Kalsbeek A 2009 Central effects of thyronamines on glucose metabolism in rats. *J Endocrinol* 201:377–386
  29. Swoap SJ, Gutilla MJ, Liles LC, Smith RO, Weinshenker D 2006 The full expression of fasting-induced torpor requires  $\beta$ 3-adrenergic receptor signaling. *J Neurosci* 26:241–245
  30. Hudson JW, Scott IM 1979 Daily torpor in the laboratory mouse, *Mus musculus* var. albino. *Physiol Zool* 52:205–218
  31. Snead AN, Santos MS, Seal RP, Miyakawa M, Edwards RH, Scanlan TS 2007 Thyronamines inhibit plasma membrane and vesicular monoamine transport. *ACS Chem Biol* 2:390–398
  32. Felt V, Ploc I 1982 Effect of theophylline on binding of triiodothyronine, thyroxine, thyroxamine, tetraiodothyroacetic acid and cortisol in the cytosol of human leukocytes. *Endokrinologie* 79:315–317
  33. Felt V, Ploc I 1981 Effect of theophylline on binding of L-triiodothyronine (T3) to cytosolic receptors of human leukocytes. *Endokrinologie* 77:109–111
  34. Buu-Hoi NP, Pham-Huu-Chanh, Petit L 1966 Some biological effects of thyronamine. *Med Pharmacol Exp Int J Exp Med* 15:17–23
  35. Tan ES, Naylor JC, Groban ES, Bunzow JR, Jacobson MP, Grandy DK, Scanlan TS 2009 The molecular basis of species-specific ligand activation of trace amine-associated receptor 1 (TAAR(1)). *ACS Chem Biol* 4:209–220
  36. Hart ME, Suchland KL, Miyakawa M, Bunzow JR, Grandy DK, Scanlan TS 2006 Trace amine-associated receptor agonists: synthesis and evaluation of thyronamines and related analogues. *J Med Chem* 49:1101–1112
  37. Panas HN, Lynch LJ, Vallender EJ, Xie Z, Chen GL, Lynn SK, Scanlan TS, Miller GM 2010 Normal thermoregulatory responses to 3-iodothyronamine, trace amines and amphetamine-like psychostimulants in trace amine associated receptor 1 knockout mice. *J Neurosci Res* 88:1962–1969
  38. Bylund DB, Ray-Prenger C, Murphy TJ 1988  $\alpha$ -2A and  $\alpha$ -2B adrenergic receptor subtypes: antagonist binding in tissues and cell lines containing only one subtype. *J Pharmacol Exp Ther* 245:600–607
  39. Liggett SB 2004 The two-timing thyroid. *Nat Med* 10:582–583
  40. Hoefig CS, Schlärman P, Piehl S, Bertoldi M, Scanlan TS, Schweizer U, Köhrle J Towards the identification of iodothyronine decarboxylases. Proc 34th Annual meeting of the European Thyroid Association, Lisbon, Portugal, 2009, pp 138 (Abstract)
  41. Köhrle J 2002 Iodothyronine deiodinases. *Methods Enzymol* 347:125–167
  42. Piehl S, Heberer T, Balizs G, Scanlan TS, Köhrle J 2008 Development of a validated liquid chromatography/tandem mass spectrometry method for the distinction of thyronine and thyronamine constitutional isomers and for the identification of new deiodinase substrates. *Rapid Commun Mass Spectrom* 22:3286–3296
  43. Pietsch CA, Scanlan TS, Anderson RJ 2007 Thyronamines are substrates for human liver sulfotransferases. *Endocrinology* 148:1921–1927
  44. Wood WJ, Geraci T, Nilsen A, DeBarber AE, Scanlan TS 2009 Iodothyronamines are oxidatively deaminated to iodothyroacetic acids in vivo. *Chembiochem* 10:361–365
  45. Wu SY, Green WL, Huang WS, Hays MT, Chopra IJ 2005 Alternate pathways of thyroid hormone metabolism. *Thyroid* 15:943–958
  46. Ianculescu AG, Giacomini KM, Scanlan TS 2009 Identification and characterization of 3-iodothyronamine intracellular transport. *Endocrinology* 150:1991–1999
  47. Cheng SY, Leonard JL, Davis PJ 2010 Molecular aspects of thyroid hormone actions. *Endocr Rev* 31:139–170
  48. Moreno M, de Lange P, Lombardi A, Silvestri E, Lanni A, Goglia F 2008 Metabolic effects of thyroid hormone derivatives. *Thyroid* 18:239–253
  49. Scapin S, Leoni S, Spagnuolo S, Gnocchi D, De Vito P, Luly P, Pedersen JZ, Incerpi S 2010 Short-term effects of thyroid hormones during development: focus on signal transduction. *Steroids* 75:576–584
  50. Davis PJ, Davis FB, Lin HY, Mousa SA, Zhou M, Luidens MK 2009 Translational implications of nongenomic actions of thyroid hormone initiated at its integrin receptor. *Am J Physiol Endocrinol Metab* 297:E1238–E1246
  51. Wrutniak-Cabello C, Casas F, Cabello G 2001 Thyroid hormone action in mitochondria. *J Mol Endocrinol* 26:67–77
  52. Lombardi A, de Lange P, Silvestri E, Busiello RA, Lanni A, Goglia F, Moreno M 2009 3,5-Diiodo-L-thyronine rapidly enhances mitochondrial fatty acid oxidation rate and thermogenesis in rat skeletal muscle: AMP-activated protein kinase involvement. *Am J Physiol Endocrinol Metab* 296:E497–E502
  53. Mollica MP, Lionetti L, Moreno M, Lombardi A, De Lange P, Antonelli A, Lanni A, Cavaliere G, Barletta A, Goglia F 2009 3,5-Diiodo-L-thyronine, by modulating mitochondrial functions, reverses hepatic fat accumulation in rats fed a high-fat diet. *J Hepatol* 51:363–370
  54. Ribeiro MO, Bianco SD, Kaneshige M, Schultz JJ, Cheng SY, Bianco AC, Brent GA 2010 Expression of uncoupling protein 1 in mouse brown adipose tissue is thyroid hormone receptor- $\beta$  isoform specific and required for adaptive thermogenesis. *Endocrinology* 151:432–440
  55. Watanabe M, Houten SM, Matakaki C, Christoffolete MA, Kim BW, Sato H, Messaddeq N, Harney JW, Ezaki O, Kodama T, Schoonjans K, Bianco AC, Auwerx J 2006 Bile acids induce energy expenditure by promoting intracellular thyroid hormone activation. *Nature* 439:484–489
  56. Lei J, Bhargava M, Ingbar DH 2009 Cell-specific signal transduction pathways regulating Na<sup>+</sup>-K<sup>+</sup>-ATPase. Focus on “short-term effects of thyroid hormones on the Na<sup>+</sup>-K<sup>+</sup>-ATPase activity of chick embryo hepatocytes during development: focus on signal transduction.” *Am J Physiol Cell Physiol* 296:C1–C3
  57. Moeller LC, Cao X, Dumitrescu AM, Seo H, Refetoff S 2006 Thyroid hormone mediated changes in gene expression can be initiated by cytosolic action of the thyroid hormone receptor  $\beta$  through the phosphatidylinositol 3-kinase pathway. *Nucl Recept Signal* 4:e020
  58. Luidens MK, Mousa SA, Davis FB, Lin HY, Davis PJ 2010 Thyroid hormone and angiogenesis. *Vascul Pharmacol* 52:142–145
  59. Farwell AP, Dubord-Tomasetti SA, Pietrzykowski AZ, Stachelek SJ, Leonard JL 2005 Regulation of cerebellar neuronal migration and neurite outgrowth by thyroxine and



- 3,3',5'-triiodothyronine. *Brain Res Dev Brain Res* 154:121–135
60. Scarlett A, Parsons MP, Hanson PL, Sidhu KK, Milligan TP, Burrin JM 2008 Thyroid hormone stimulation of extracellular signal-regulated kinase and cell proliferation in human osteoblast-like cells is initiated at integrin  $\alpha$ V $\beta$ 3. *J Endocrinol* 196:509–517
  61. Tomanek RJ, Zimmerman MB, Suvarna PR, Morkin E, Pennock GD, Goldman S 1998 A thyroid hormone analog stimulates angiogenesis in the post-infarcted rat heart. *J Mol Cell Cardiol* 30:923–932
  62. Zheng W, Weiss RM, Wang X, Zhou R, Arlen AM, Lei L, Lazartigues E, Tomanek RJ 2004 DITPA stimulates arteriolar growth and modifies myocardial postinfarction remodeling. *Am J Physiol Heart Circ Physiol* 286:H1994–H2000
  63. Guran T, Turan S, Bircan R, Bereket A 2009 9 Years follow-up of a patient with pituitary form of resistance to thyroid hormones (PRTH): comparison of two treatment periods of D-thyroxine and triiodothyroacetic acid (TRIAC). *J Pediatr Endocrinol Metab* 22:971–978
  64. Torre P, Bertoli M, Di Giovanni S, Scommegna S, Conte C, Novelli G, Cianfarani S 2005 Endocrine and neuropsychological assessment in a child with a novel mutation of thyroid hormone receptor: response to 12-month triiodothyroacetic acid (TRIAC) therapy. *J Endocrinol Invest* 28:657–662
  65. Radetti G, Persani L, Molinaro G, Mannavola D, Cortelazzi D, Chatterjee VK, Beck-Peccoz P 1997 Clinical and hormonal outcome after two years of triiodothyroacetic acid treatment in a child with thyroid hormone resistance. *Thyroid* 7:775–778
  66. Sherman SI, Ringel MD, Smith MJ, Kopelen HA, Zoghbi WA, Ladenson PW 1997 Augmented hepatic and skeletal thyromimetic effects of tiratricol in comparison with levothyroxine. *J Clin Endocrinol Metab* 82:2153–2158
  67. Hill Jr SR, Barker SB, McNeil JH, Tingley JO, Hibbett LL 1960 The metabolic effects of the acetic and propionic acid analogs of thyroxine and triiodothyronine. *J Clin Invest* 39:523–533
  68. Stamler J 1977 The coronary drug project—findings with regard to estrogen, dextrothyroxine, clofibrate and niacin. *Adv Exp Med Biol* 82:52–75
  69. Baxter JD, Webb P 2009 Thyroid hormone mimetics: potential applications in atherosclerosis, obesity and type 2 diabetes. *Nat Rev Drug Discov* 8:308–320
  70. Grover GJ, Mellström K, Ye L, Malm J, Li YL, Bladh LG, Slep PG, Smith MA, George R, Vennström B, Mookhtiar K, Horvath R, Speelman J, Egan D, Baxter JD 2003 Selective thyroid hormone receptor- $\beta$  activation: a strategy for reduction of weight, cholesterol, and lipoprotein (a) with reduced cardiovascular liability. *Proc Natl Acad Sci USA* 100:10067–10072
  71. Berkenstam A, Kristensen J, Mellström K, Carlsson B, Malm J, Rehnmark S, Garg N, Andersson CM, Rudling M, Sjöberg F, Angelin B, Baxter JD 2008 The thyroid hormone mimetic compound KB2115 lowers plasma LDL cholesterol and stimulates bile acid synthesis without cardiac effects in humans. *Proc Natl Acad Sci USA* 105:663–667
  72. Ladenson PW, Kristensen JD, Ridgway EC, Olsson AG, Carlsson B, Klein I, Baxter JD, Angelin B 2010 Use of the thyroid hormone analogue eprotirome in statin-treated dyslipidemia. *N Engl J Med* 362:906–916
  73. Hoefig CS, Köhrle J, Brabant G, Dixit K, Strasburger CJ, Wu Z A novel chemiluminescent immunoassay identifies 3-iodothyronamine in human serum and provides evidence for its extrathyroidal formation. 14th International Thyroid Congress, Paris, France, 2010, Oral communications, Late Breaking Communication LB10 (Abstract)
  74. Bhargava M, Lei J, Mariash CN, Ingbar DH 2007 Thyroid hormone rapidly stimulates alveolar Na,K-ATPase by activation of phosphatidylinositol 3-kinase. *Curr Opin Endocrinol Diabetes Obes* 14:416–420
  75. Köhrle J 2000 The selenoenzyme family of deiodinase isozymes controls local thyroid hormone availability. *Rev Endocr Metab Disord* 1:49–58
  76. Brenta G, Schnitman M, Fretes O, Facco E, Gurfinkel M, Damilano S, Pacenza N, Blanco A, Gonzalez E, Pisarev MA 2003 Comparative efficacy and side effects of the treatment of euthyroid goiter with levo-thyroxine or triiodothyroacetic acid. *J Clin Endocrinol Metab* 88:5287–5292
  77. Chiellini G, Apriletti JW, Yoshihara HA, Baxter JD, Ribeiro RC, Scanlan TS 1998 A high-affinity subtype-selective agonist ligand for the thyroid hormone receptor. *Chem Biol* 5:299–306
  78. Mousa SA, O'Connor LJ, Bergh JJ, Davis FB, Scanlan TS, Davis PJ 2005 The proangiogenic action of thyroid hormone analogue GC-1 is initiated at an integrin. *J Cardiovasc Pharmacol* 46:356–360
  79. Morkin E, Pennock GD, Spooner PH, Bahl JJ, Goldman S 2002 Clinical and experimental studies on the use of 3,5-diiiodothyropropionic acid, a thyroid hormone analogue, in heart failure. *Thyroid* 12:527–533
